# Supplementary material for: Structure-Optical, Linear and Nonlinear optical properties relationship in thiazolidine-amides
Source: Research Square preprint supplement (doi:10.21203/rs.3.rs-6911850/v1), 2025-06-27
Supplement: Supplementary file 1 [file fb3441f21218d93cc7b46791.docx]

### Structure-Optical, Linear and Nonlinear optical properties relationship in thiazolidine-amides

### Mostefa Boumediene 1,2, Benamar Baroudi 3 , Toufik Bensafi 4, Djebar Hadji 4,5
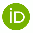
*

1 Faculty of Material Sciences, University of Tiaret – Ibn Khaldoun, Tiaret, Algeria

2 Laboratory of Chemistry: Synthesis, properties and applications (LCSPA), Faculty of technology and Sciences, University of Saida - Dr Moulay Tahar, Saida, Algeria

3 Department of Chemistry, Faculty of Exact Sciences and Computer Science, University of Hassiba Benbouali, Chlef, 02000, Algeria

4 Modeling and Calculation Methods Laboratory, University of Saida – Dr. Moulay Tahar, B.P. 138, 20002 Saida, Algeria

5 Department of Material Sciences, Faculty of Sciences and Technology, University of Saida – Dr. Moulay Tahar, 20000 Saida, Algeria

**Table S1**

The coordinates of the optimized structure of **THA@H** obtained at the B3LYP/6–311++G(d,p) level.

-------------------------------------------------------------------

Atom Type Coordinates (Angstroms)

X Y Z

-------------------------------------------------------------------

O -3.46961000 -0.82096700 -2.26177600

C -3.27790700 -0.86800500 -1.05163100

N -4.25736900 -1.30051500 -0.20592000

C -4.19193400 -1.49250600 1.25045500

C -5.36358600 -2.39758200 1.61968700

S -6.74319000 -1.81920100 0.56266500

C -5.56581000 -1.57521600 -0.81774200

C -1.86284200 -0.51182300 -0.54400600

H -1.52859900 0.23532900 -1.26229200

N -1.73072700 0.02459000 0.80992100

C -1.83131800 1.30328600 1.29210600

C -2.47451000 2.37156200 0.44513500

C -2.24623800 3.70922200 0.78156200

C -2.86126100 4.69488700 0.01877100

C -3.68498100 4.31280400 -1.03811100

C -3.85676400 2.95274500 -1.28813600

N -3.26446300 1.99961700 -0.56630900

O -1.42610900 1.57556600 2.41654900

C -0.96127700 -1.76439100 -0.69619700

C 0.51464400 -1.49221300 -0.50881100

C 1.20572600 -1.94660300 0.62189500

C 2.55784400 -1.68717900 0.80035500

C 1.23754700 -0.77306200 -1.46197200

C 2.59678500 -0.50223600 -1.30231200

C 3.26535900 -0.95855000 -0.16145500

O 4.58912100 -0.75395500 0.10215300

C 5.37112700 -0.00849800 -0.84138900

C 6.77680000 0.09404400 -0.31487600

C 7.72694800 -0.88018700 -0.63288100

C 9.02220300 -0.79996400 -0.12579000

C 9.38056600 0.25977100 0.70629100

C 8.43965600 1.23670700 1.02900600

C 7.14555400 1.15252300 0.51997200

H -4.26944800 -0.53673200 1.77418700

H -3.24885600 -1.96138200 1.53441400

H -5.64379200 -2.29363900 2.66769500

H -5.14529800 -3.44786300 1.41248000

H -5.89099800 -0.73403900 -1.42864500

H -5.51264100 -2.46248500 -1.45200000

H -1.22477700 -0.55395100 1.46840700

H -1.60873800 3.94343200 1.62451800

H -2.70403400 5.74423200 0.24618000

H -4.18586200 5.04933300 -1.65687400

H -4.49035300 2.60909200 -2.10124700

H -1.15030600 -2.16636200 -1.69468200

H -1.28736500 -2.53490000 0.01264400

H 0.68155200 -2.52756900 1.37669600

H 3.08652100 -2.04165200 1.67815100

H 0.73793500 -0.41671600 -2.35882700

H 3.11610400 0.05544100 -2.07138300

H 4.93177400 0.98708100 -0.97121900

H 5.35598400 -0.51989100 -1.81073300

H 7.45002000 -1.70822000 -1.27905800

H 9.75132900 -1.56223700 -0.38110700

H 10.38988000 0.32513700 1.09997400

H 8.71391500 2.06423600 1.67540000

H 6.41382500 1.91333700 0.77585700

----------------------------------------------------------------------

**Table S2**

The coordinates of the optimized structure of **THA@Cl** obtained at the B3LYP/6–311++G** level.

-------------------------------------------------------------

Atom Type Coordinates (Angstroms)

X Y Z

-------------------------------------------------------------

O -3.49333400 -0.36277100 -2.26444800

C -3.28214100 -0.76228500 -1.12487400

N -4.26967300 -1.35706500 -0.39419600

C -4.15902400 -2.02485800 0.91556300

C -5.39238400 -2.91452700 1.05636800

S -6.75254100 -1.94766500 0.30153400

C -5.60282200 -1.40758800 -1.01306000

C -1.85360100 -0.57925400 -0.55464600

H -1.49225100 0.28539500 -1.10802600

N -1.74014500 -0.30917700 0.87471400

C -2.23425100 0.76399000 1.57963500

C -2.44247300 2.06048400 0.85150200

C -1.44312700 2.60169300 0.04250900

C -1.63529100 3.84461700 -0.55937600

C -2.83039200 4.53874900 -0.36829000

C -3.82248800 3.99340600 0.44534800

O -2.47134200 0.66443400 2.77624800

C -0.96958500 -1.78693800 -0.94742200

C 0.50740000 -1.56177700 -0.70999400

C 1.19252800 -2.22238900 0.31753400

C 2.54374100 -2.00331900 0.54694600

C 1.23475900 -0.67809100 -1.50821800

C 2.59311600 -0.44190900 -1.29316900

C 3.25582300 -1.10480500 -0.25528400

O 4.57698900 -0.95234900 0.05060800

C 5.35822100 -0.02517700 -0.71697000

C 6.75786800 -0.01583800 -0.16537000

C 7.73533000 -0.86361700 -0.69296800

C 9.02582300 -0.87282500 -0.16718300

C 9.35140200 -0.03124000 0.89527000

C 8.38268100 0.81824400 1.42872500

C 7.09409400 0.82483100 0.89967200

H -4.12323300 -1.29422100 1.72632100

H -3.25447200 -2.63625100 0.95724500

H -5.62823300 -3.11726100 2.10061300

H -5.27074900 -3.86343700 0.52887100

H -5.89405300 -0.42375100 -1.37723700

H -5.61119600 -2.10476200 -1.85410000

H -1.55706300 -1.09995500 1.47797000

H -2.98460400 5.50319600 -0.84613600

H -4.74753400 4.53986100 0.59650100

H -1.15940100 -1.98716000 -2.00552000

H -1.29910000 -2.67922300 -0.40222400

H 0.66326300 -2.93024700 0.95035900

H 3.06839500 -2.51765100 1.34444500

H 0.74161100 -0.15831900 -2.32536400

H 3.11511700 0.25154000 -1.94028000

H 4.90682700 0.97124300 -0.64939200

H 5.35801500 -0.33185300 -1.76907800

H 7.48449500 -1.52282100 -1.51903200

H 9.77627900 -1.53493300 -0.58707600

H 10.35655300 -0.03536100 1.30466100

H 8.63136200 1.47654900 2.25494500

H 6.34139100 1.48609000 1.31912000

C -3.63164800 2.76519500 1.06827200

H -4.38806000 2.35093700 1.72394700

H -0.49790700 2.09154900 -0.10484000

Cl -0.31732410 4.46783830 -1.54535697

---------------------------------------------------------------------

**Table S3**

The coordinates of the optimized structure of **THA@FF** obtained at the B3LYP/6–311++G** level.

-------------------------------------------------------------------

Atom Type Coordinates (Angstroms)

X Y Z

-------------------------------------------------------------------

C -3.08758800 -1.08860100 -1.17212600

N -3.95454800 -1.86874100 -0.43794800

C -3.67151800 -2.60746300 0.82164200

C -4.76626200 -3.67440000 0.97534300

S -6.35323500 -2.82101800 0.38928400

C -5.34095600 -1.97300900 -0.96076900

C -1.63610500 -0.83613900 -0.70182900

H -1.34205500 0.06409700 -1.25403600

N -1.46597100 -0.62828100 0.74259600

C -2.03085100 0.35248600 1.53338700

C -2.92284400 1.38033000 0.86891400

C -2.43678600 2.48991100 0.14711000

C -3.32173400 3.43830800 -0.39923200

C -4.70830200 3.28639100 -0.21967100

C -5.20761200 2.19855100 0.51989500

O -1.85299600 0.35492700 2.77962000

C -0.72952600 -2.01055000 -1.18980400

C 0.75127400 -1.80270200 -0.91330100

C 1.42550000 -2.57665800 0.05980300

C 2.78913500 -2.38820700 0.32494000

C 1.49436300 -0.83699900 -1.62118000

C 2.86315000 -0.63474600 -1.37124300

C 3.51298900 -1.41203600 -0.38851000

O 4.86431200 -1.30214300 -0.05663900

C 5.67255600 -0.27875100 -0.72189400

C 7.06569400 -0.29757300 -0.12720900

C 8.16978000 0.05722800 -0.92981800

C 9.46607100 0.10127100 -0.38287200

C 9.67025700 -0.21988900 0.97252100

C 8.57098000 -0.58445300 1.77459900

C 7.27446400 -0.62076300 1.22963200

H -3.68492400 -1.93197700 1.68426300

H -2.68475400 -3.07860200 0.77763700

H -4.89902100 -3.97978700 2.01521000

H -4.58106200 -4.55044600 0.34762100

H -5.75414200 -0.98141300 -1.15520500

H -5.36508700 -2.56118800 -1.88174900

H -0.77677600 -1.20260300 1.22207300

H -5.38627200 4.02018200 -0.64772400

H -6.27683800 2.08575100 0.67710800

H -0.91068300 -2.10854100 -2.26708700

H -1.06109200 -2.94819400 -0.72381900

H 0.88423600 -3.34735700 0.60740900

H 3.30978000 -2.98268100 1.06941400

H 1.00534000 -0.23274400 -2.38292800

H 3.40187900 0.11428000 -1.94233800

H 5.19617400 0.70319400 -0.56619200

H 5.71105300 -0.47681300 -1.80317700

H 8.02212100 0.29572900 -1.98214500

H 10.30991900 0.37583200 -1.01146600

H 10.67140300 -0.19154100 1.39613200

H 8.72371400 -0.83993800 2.82065000

H 6.42668100 -0.91359400 1.84104600

C -4.31773400 1.25958000 1.06371200

H -4.69805700 0.42890400 1.65207600

F -1.11303414 2.71006225 -0.00024824

F -2.84343318 4.49645971 -1.08774001

----------------------------------------------------------------------

**Table S4**

The coordinates of the optimized structure of **THA@I** obtained at the B3LYP/6–311++G** level.

-------------------------------------------------------------

Atom Type Coordinates (Angstroms)

X Y Z

-------------------------------------------------------------

O -3.46961000 -0.82096700 -2.26177600

C -3.27790700 -0.86800500 -1.05163100

N -4.25736900 -1.30051500 -0.20592000

C -4.19193400 -1.49250600 1.25045500

C -5.36358600 -2.39758200 1.61968700

S -6.74319000 -1.81920100 0.56266500

C -5.56581000 -1.57521600 -0.81774200

C -1.86284200 -0.51182300 -0.54400600

H -1.52859900 0.23532900 -1.26229200

N -1.73072700 0.02459000 0.80992100

C -1.83131800 1.30328600 1.29210600

C -2.47451000 2.37156200 0.44513500

C -2.24623800 3.70922200 0.78156200

C -2.86126100 4.69488700 0.01877100

C -3.68498100 4.31280400 -1.03811100

C -3.85676400 2.95274500 -1.28813600

O -1.42610900 1.57556600 2.41654900

C -0.96127700 -1.76439100 -0.69619700

C 0.51464400 -1.49221300 -0.50881100

C 1.20572600 -1.94660300 0.62189500

C 2.55784400 -1.68717900 0.80035500

C 1.23754700 -0.77306200 -1.46197200

C 2.59678500 -0.50223600 -1.30231200

C 3.26535900 -0.95855000 -0.16145500

O 4.58912100 -0.75395500 0.10215300

C 5.37112700 -0.00849800 -0.84138900

C 6.77680000 0.09404400 -0.31487600

C 7.72694800 -0.88018700 -0.63288100

C 9.02220300 -0.79996400 -0.12579000

C 9.38056600 0.25977100 0.70629100

C 8.43965600 1.23670700 1.02900600

C 7.14555400 1.15252300 0.51997200

H -4.26944800 -0.53673200 1.77418700

H -3.24885600 -1.96138200 1.53441400

H -5.64379200 -2.29363900 2.66769500

H -5.14529800 -3.44786300 1.41248000

H -5.89099800 -0.73403900 -1.42864500

H -5.51264100 -2.46248500 -1.45200000

H -1.22477700 -0.55395100 1.46840700

H -2.70403400 5.74423200 0.24618000

H -4.18586200 5.04933300 -1.65687400

H -4.49035300 2.60909200 -2.10124700

H -1.15030600 -2.16636200 -1.69468200

H -1.28736500 -2.53490000 0.01264400

H 0.68155200 -2.52756900 1.37669600

H 3.08652100 -2.04165200 1.67815100

H 0.73793500 -0.41671600 -2.35882700

H 3.11610400 0.05544100 -2.07138300

H 4.93177400 0.98708100 -0.97121900

H 5.35598400 -0.51989100 -1.81073300

H 7.45002000 -1.70822000 -1.27905800

H 9.75132900 -1.56223700 -0.38110700

H 10.38988000 0.32513700 1.09997400

H 8.71391500 2.06423600 1.67540000

H 6.41382500 1.91333700 0.77585700

C -3.26446300 1.99961700 -0.56630900

H -3.41875699 0.96521915 -0.79239405

I -1.00953282 4.16357293 2.41683737

---------------------------------------------------------------------

**Table S5**

The coordinates of the optimized structure of **THA@OH** obtained at the B3LYP/6–311++G** level.

-------------------------------------------------------------

Atom Type Coordinates (Angstroms)

X Y Z

-------------------------------------------------------------

O -3.49333400 -0.36277100 -2.26444800

C -3.28214100 -0.76228500 -1.12487400

N -4.26967300 -1.35706500 -0.39419600

C -4.15902400 -2.02485800 0.91556300

C -5.39238400 -2.91452700 1.05636800

S -6.75254100 -1.94766500 0.30153400

C -5.60282200 -1.40758800 -1.01306000

C -1.85360100 -0.57925400 -0.55464600

H -1.49225100 0.28539500 -1.10802600

N -1.74014500 -0.30917700 0.87471400

C -2.23425100 0.76399000 1.57963500

C -2.44247300 2.06048400 0.85150200

C -1.44312700 2.60169300 0.04250900

C -1.63529100 3.84461700 -0.55937600

C -2.83039200 4.53874900 -0.36829000

C -3.82248800 3.99340600 0.44534800

O -2.47134200 0.66443400 2.77624800

C -0.96958500 -1.78693800 -0.94742200

C 0.50740000 -1.56177700 -0.70999400

C 1.19252800 -2.22238900 0.31753400

C 2.54374100 -2.00331900 0.54694600

C 1.23475900 -0.67809100 -1.50821800

C 2.59311600 -0.44190900 -1.29316900

C 3.25582300 -1.10480500 -0.25528400

O 4.57698900 -0.95234900 0.05060800

C 5.35822100 -0.02517700 -0.71697000

C 6.75786800 -0.01583800 -0.16537000

C 7.73533000 -0.86361700 -0.69296800

C 9.02582300 -0.87282500 -0.16718300

C 9.35140200 -0.03124000 0.89527000

C 8.38268100 0.81824400 1.42872500

C 7.09409400 0.82483100 0.89967200

H -4.12323300 -1.29422100 1.72632100

H -3.25447200 -2.63625100 0.95724500

H -5.62823300 -3.11726100 2.10061300

H -5.27074900 -3.86343700 0.52887100

H -5.89405300 -0.42375100 -1.37723700

H -5.61119600 -2.10476200 -1.85410000

H -1.55706300 -1.09995500 1.47797000

H -2.98460400 5.50319600 -0.84613600

H -4.74753400 4.53986100 0.59650100

H -1.15940100 -1.98716000 -2.00552000

H -1.29910000 -2.67922300 -0.40222400

H 0.66326300 -2.93024700 0.95035900

H 3.06839500 -2.51765100 1.34444500

H 0.74161100 -0.15831900 -2.32536400

H 3.11511700 0.25154000 -1.94028000

H 4.90682700 0.97124300 -0.64939200

H 5.35801500 -0.33185300 -1.76907800

H 7.48449500 -1.52282100 -1.51903200

H 9.77627900 -1.53493300 -0.58707600

H 10.35655300 -0.03536100 1.30466100

H 8.63136200 1.47654900 2.25494500

H 6.34139100 1.48609000 1.31912000

C -3.63164800 2.76519500 1.06827200

H -4.38806000 2.35093700 1.72394700

O -0.61004000 4.32942300 -1.32637400

H -0.84560100 5.18864900 -1.69626100

H -0.49790700 2.09154900 -0.10484000

---------------------------------------------------------------------

**The calculation details**

The full expressions of the can be find in Ref. [54]:

We calculate the orientational averages of the tensor components and

For the invariant :

For the invariant :

after, we detail each sum separately:

The invariant :

*=*

=

=

and the same for the second term .
